# Supplementary material
Source: Springer Nature journal article supplement (https://www.springermedizin.de/resource/supplementary/12913_2008_846_MOESM2_ESM.pdf/9535734)

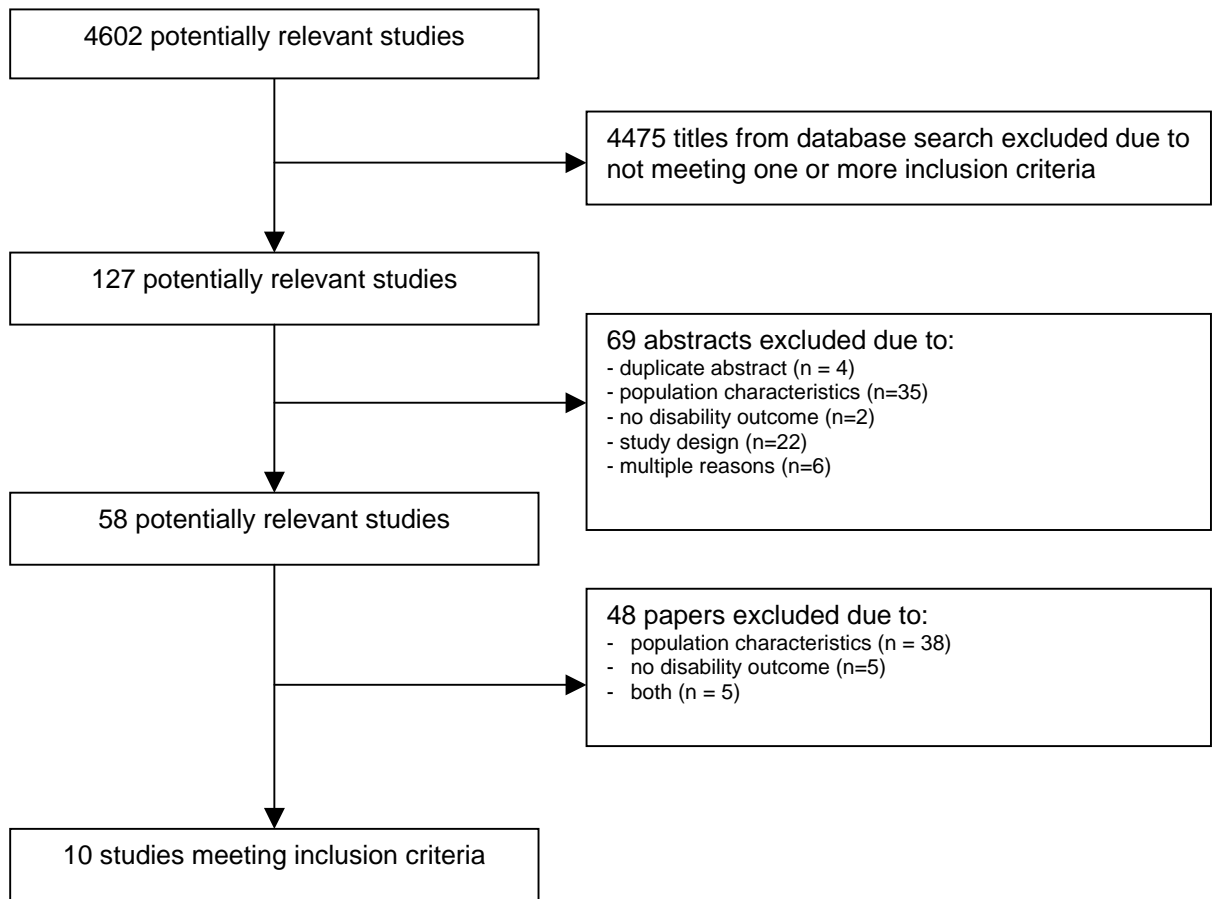

*Information on the selection process is available from the first author*

Supplement: MOESM2 [file 9535734]
